# Supplementary material for: Unified regression model of binding equilibria in crowded environments
Source: PubMed Central journal article supplement — Sci Rep. 2011 Sep 20;1:97. doi: 10.1038/srep00097 (PMC3239167; doi:10.1038/srep00097), 2011-09-20
Supplement: srep00097-s3.pdf [file srep00097-s3.pdf]

**Supplementary information:**

**Unified Regression Model of Binding Equilibria in Crowded Environments**

**Byoungkoo Lee<sup>1</sup>, Philip R. LeDuc<sup>2</sup>, and Russell Schwartz<sup>1,\*</sup>**

1 Department of Biological Sciences and Lane Center for Computational Biology, Carnegie Mellon University, 654 Mellon Institute, 4400 Fifth Avenue, Pittsburgh, PA 15213, 2 Departments of Mechanical and Biomedical Engineering, and Lane Center for Computational Biology, Carnegie Mellon University, 420 Scaife Hall, 5000 Forbes Avenue, Pittsburgh, PA 15213

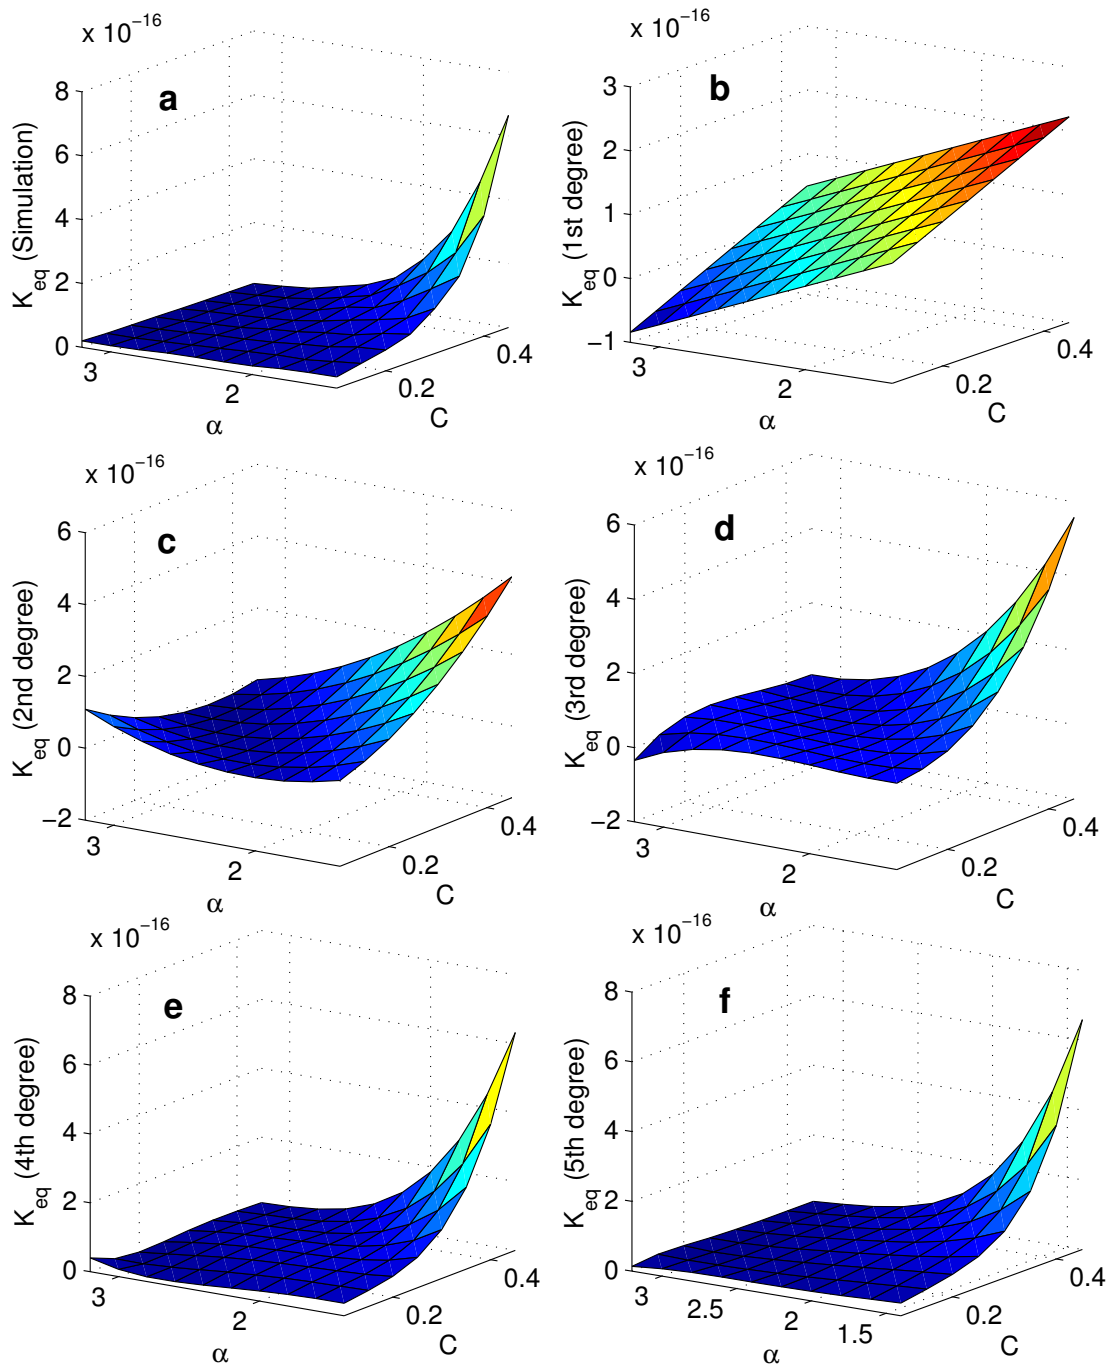

**Figure S1| Surface plots of  $K_{eq}$  for pairwise parameter variations.** (a-f):  $\alpha$  and Concentration( $C$ ). **a**, average value from simulation data. **b**, 1<sup>st</sup>. **c**, 2<sup>nd</sup>. **d**, 3<sup>rd</sup>. **e**, 4<sup>th</sup>. **f**, 5<sup>th</sup> degree polynomial regression model fit to the data of part (a), respectively.

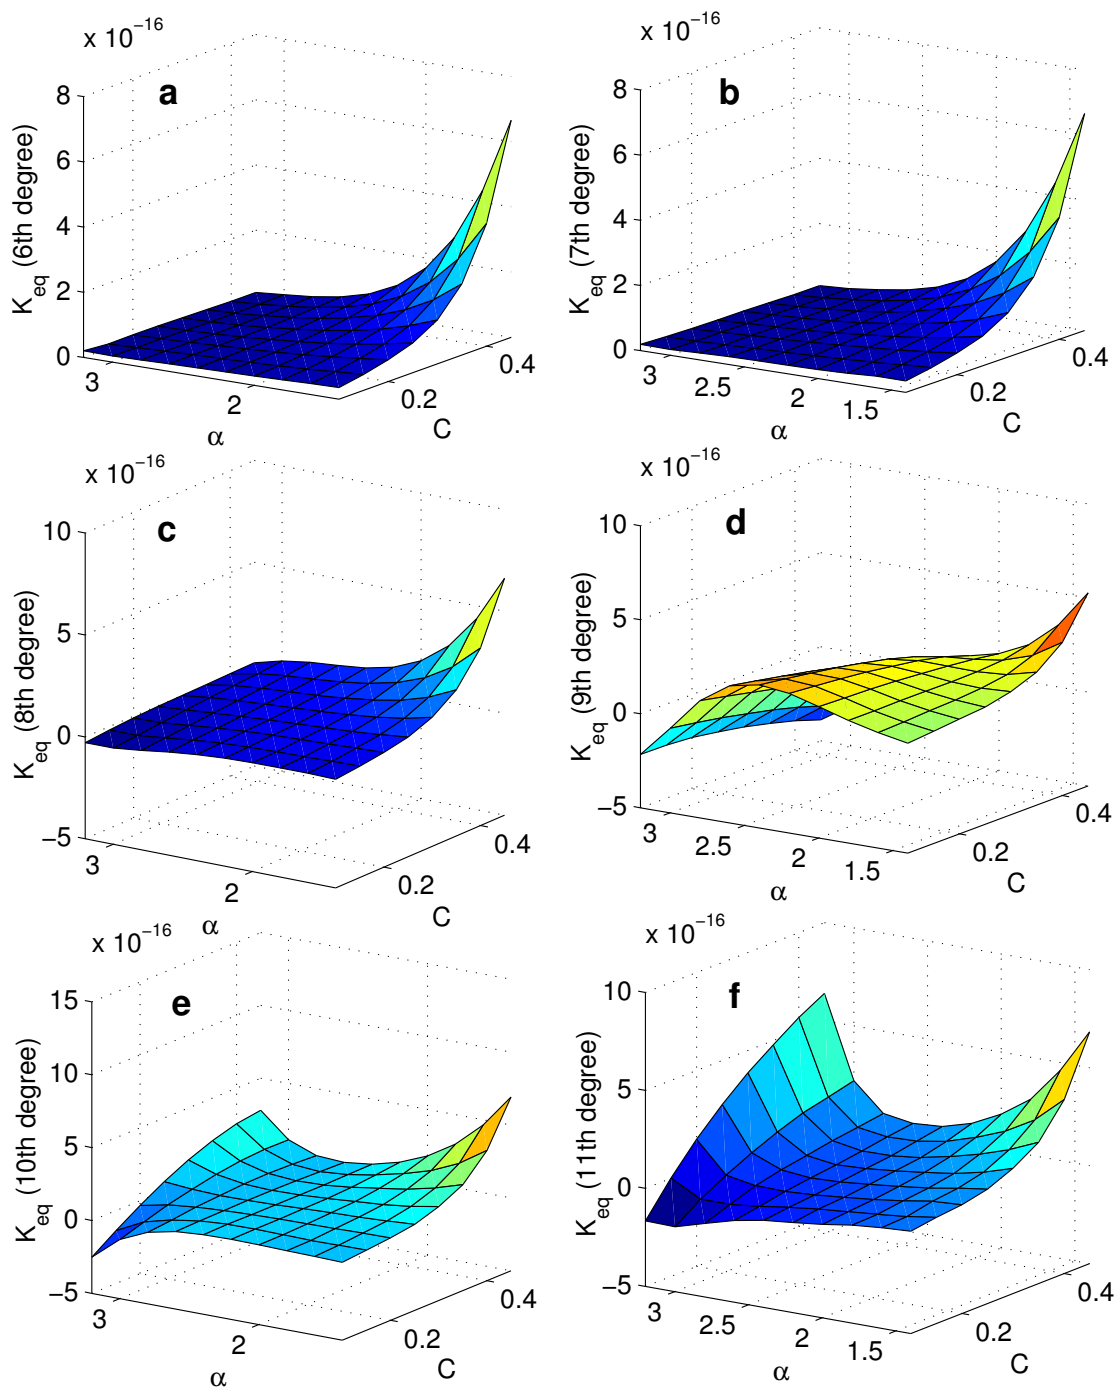

**Figure S2l** Surface plots of  $K_{eq}$  for pairwise parameter variations. (a-f):  $\alpha$  and Concentration( $C$ ). a, 6<sup>th</sup>. b, 7<sup>th</sup>. c, 8<sup>th</sup>. d, 9<sup>th</sup>. e, 10<sup>th</sup>. f, 11<sup>th</sup> degree polynomial regression model fit to the data of part (Fig. S1a), respectively.

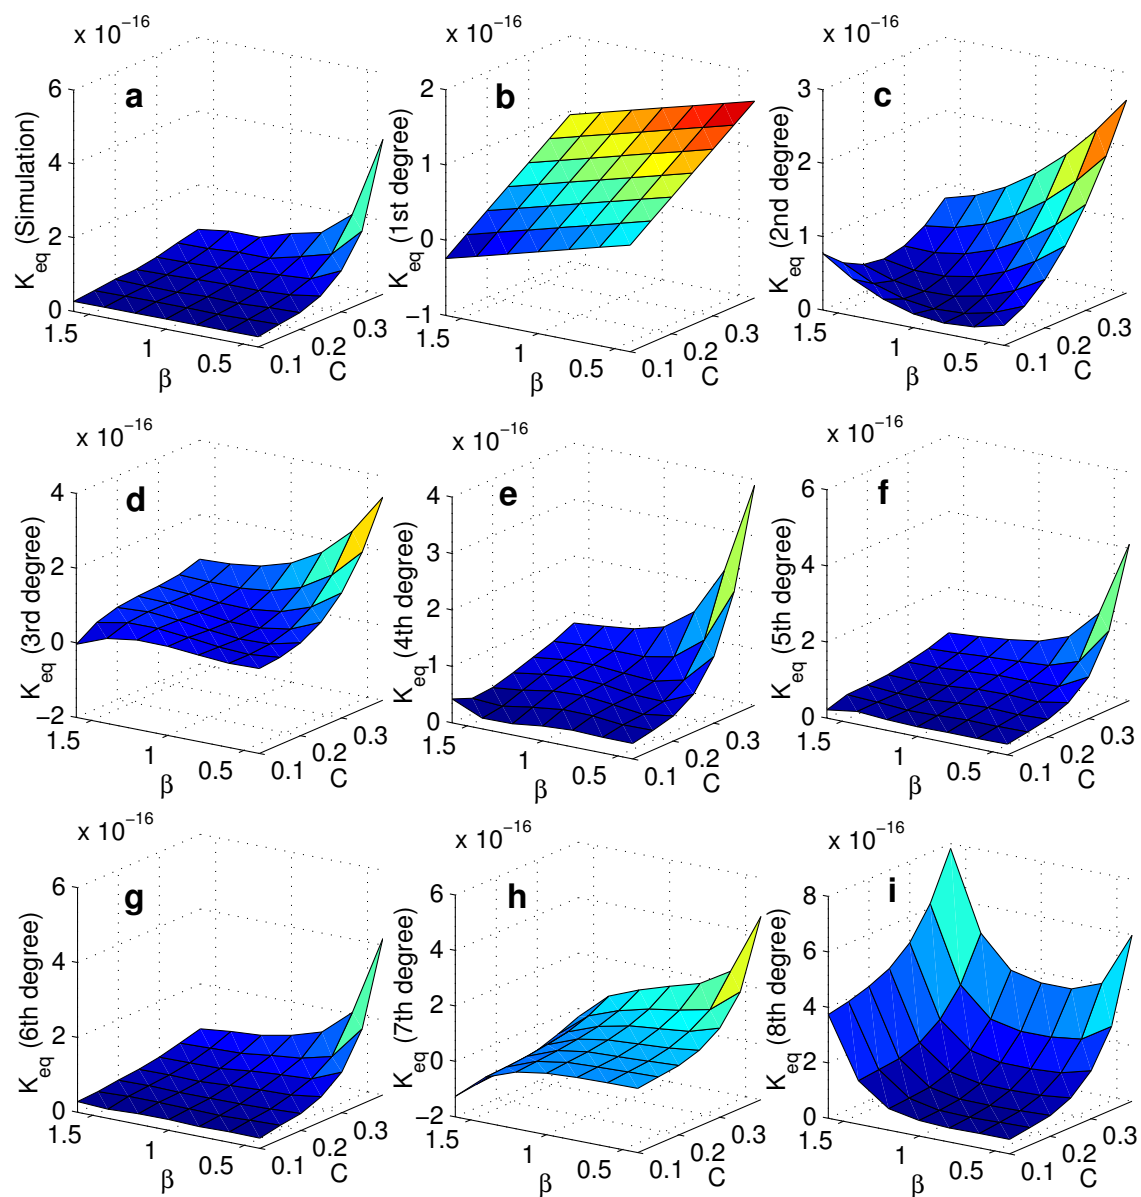

**Figure S3I Surface plots of  $K_{eq}$  for pairwise parameter variations.** (a-i):  $\beta$  and Concentration( $C$ ). **a**, average value from simulation data. **b**, 1<sup>st</sup>. **c**, 2<sup>nd</sup>. **d**, 3<sup>rd</sup>. **e**, 4<sup>th</sup>. **f**, 5<sup>th</sup>. **g**, 6<sup>th</sup>. **h**, 7<sup>th</sup>. **i**, 8<sup>th</sup> degree polynomial regression model fit to the data of part (a), respectively.
